# Supplementary material for: Quantitative Proteomics by iTRAQ-PRM based Reveals the New Characterization for Gout.
Source: Research Square preprint supplement (doi:10.21203/rs.3.rs-286084/v2), 2021-07-20
Supplement: Supplementary file 1 [file 78e66ba1b308a952902c55f5.xlsx]

## Sheet: Sheet1
ProteinID	KO	Name	Definition	MapID	MapName	URL
A0A024R0T8
B0YIW2	K08759	APOC3	apolipoprotein C-III	ko03320	PPAR signaling pathway	http://www.kegg.jp/kegg-bin/show_pathway?ko03320+K08759
Q9UNU2	K03989	C4	complement component 4	ko04610	Complement and coagulation cascades	http://www.kegg.jp/kegg-bin/show_pathway?ko04610+K03989
Q9UNU2	K03989	C4	complement component 4	ko05133	Pertussis	http://www.kegg.jp/kegg-bin/show_pathway?ko05133+K03989
Q9UNU2	K03989	C4	complement component 4	ko05150	Staphylococcus aureus infection	http://www.kegg.jp/kegg-bin/show_pathway?ko05150+K03989
Q9UNU2	K03989	C4	complement component 4	ko05322	Systemic lupus erythematosus	http://www.kegg.jp/kegg-bin/show_pathway?ko05322+K03989
K7ER74
B4DR52	K11252	H2B	histone H2B	ko05034	Alcoholism	http://www.kegg.jp/kegg-bin/show_pathway?ko05034+K11252
B4DR52	K11252	H2B	histone H2B	ko05203	Viral carcinogenesis	http://www.kegg.jp/kegg-bin/show_pathway?ko05203+K11252
B4DR52	K11252	H2B	histone H2B	ko05322	Systemic lupus erythematosus	http://www.kegg.jp/kegg-bin/show_pathway?ko05322+K11252
Q6NS36	K00522	FTH1	ferritin heavy chain [EC:1.16.3.2;]	ko04978	Mineral absorption	http://www.kegg.jp/kegg-bin/show_pathway?ko04978+K00522
P07996	K16857	THBS1	thrombospondin 1	ko04015	Rap1 signaling pathway	http://www.kegg.jp/kegg-bin/show_pathway?ko04015+K16857
P07996	K16857	THBS1	thrombospondin 1	ko04115	p53 signaling pathway	http://www.kegg.jp/kegg-bin/show_pathway?ko04115+K16857
P07996	K16857	THBS1	thrombospondin 1	ko04145	Phagosome	http://www.kegg.jp/kegg-bin/show_pathway?ko04145+K16857
P07996	K16857	THBS1	thrombospondin 1	ko04151	PI3K-Akt signaling pathway	http://www.kegg.jp/kegg-bin/show_pathway?ko04151+K16857
P07996	K16857	THBS1	thrombospondin 1	ko04350	TGF-beta signaling pathway	http://www.kegg.jp/kegg-bin/show_pathway?ko04350+K16857
P07996	K16857	THBS1	thrombospondin 1	ko04510	Focal adhesion	http://www.kegg.jp/kegg-bin/show_pathway?ko04510+K16857
P07996	K16857	THBS1	thrombospondin 1	ko04512	ECM-receptor interaction	http://www.kegg.jp/kegg-bin/show_pathway?ko04512+K16857
P07996	K16857	THBS1	thrombospondin 1	ko05144	Malaria	http://www.kegg.jp/kegg-bin/show_pathway?ko05144+K16857
P07996	K16857	THBS1	thrombospondin 1	ko05205	Proteoglycans in cancer	http://www.kegg.jp/kegg-bin/show_pathway?ko05205+K16857
P07996	K16857	THBS1	thrombospondin 1	ko05206	MicroRNAs in cancer	http://www.kegg.jp/kegg-bin/show_pathway?ko05206+K16857
P07996	K16857	THBS1	thrombospondin 1	ko05219	Bladder cancer	http://www.kegg.jp/kegg-bin/show_pathway?ko05219+K16857
P55056
P30044	K11187	PRDX5	peroxiredoxin 5, atypical 2-Cys peroxiredoxin [EC:1.11.1.15;]	ko04146	Peroxisome	http://www.kegg.jp/kegg-bin/show_pathway?ko04146+K11187
D3DNU8	K03898	KNG	kininogen	ko04610	Complement and coagulation cascades	http://www.kegg.jp/kegg-bin/show_pathway?ko04610+K03898
D9YZU5	K13823	HBB	hemoglobin subunit beta	ko05143	African trypanosomiasis	http://www.kegg.jp/kegg-bin/show_pathway?ko05143+K13823
D9YZU5	K13823	HBB	hemoglobin subunit beta	ko05144	Malaria	http://www.kegg.jp/kegg-bin/show_pathway?ko05144+K13823
A0A0U1RRH7	K11251	H2A	histone H2A	ko05034	Alcoholism	http://www.kegg.jp/kegg-bin/show_pathway?ko05034+K11251
A0A0U1RRH7	K11251	H2A	histone H2A	ko05322	Systemic lupus erythematosus	http://www.kegg.jp/kegg-bin/show_pathway?ko05322+K11251
P00352	K07249	E1.2.1.36	retinal dehydrogenase [EC:1.2.1.36;]	ko00830	Retinol metabolism	http://www.kegg.jp/kegg-bin/show_pathway?ko00830+K07249
Q6U2L6
A0A0K2BMD8	K13822	HBA	hemoglobin subunit alpha	ko05143	African trypanosomiasis	http://www.kegg.jp/kegg-bin/show_pathway?ko05143+K13822
A0A0K2BMD8	K13822	HBA	hemoglobin subunit alpha	ko05144	Malaria	http://www.kegg.jp/kegg-bin/show_pathway?ko05144+K13822
Q4TZM4	K13823	HBB	hemoglobin subunit beta	ko05143	African trypanosomiasis	http://www.kegg.jp/kegg-bin/show_pathway?ko05143+K13823
Q4TZM4	K13823	HBB	hemoglobin subunit beta	ko05144	Malaria	http://www.kegg.jp/kegg-bin/show_pathway?ko05144+K13823
A8K7G6
J3KNB4	K13916	CAMP, LL37	cathelicidin antimicrobial peptide	ko04621	NOD-like receptor signaling pathway	http://www.kegg.jp/kegg-bin/show_pathway?ko04621+K13916
J3KNB4	K13916	CAMP, LL37	cathelicidin antimicrobial peptide	ko04970	Salivary secretion	http://www.kegg.jp/kegg-bin/show_pathway?ko04970+K13916
J3KNB4	K13916	CAMP, LL37	cathelicidin antimicrobial peptide	ko05152	Tuberculosis	http://www.kegg.jp/kegg-bin/show_pathway?ko05152+K13916
B2R8I2
P11226	K03991	MBL	mannose-binding lectin	ko04145	Phagosome	http://www.kegg.jp/kegg-bin/show_pathway?ko04145+K03991
P11226	K03991	MBL	mannose-binding lectin	ko04610	Complement and coagulation cascades	http://www.kegg.jp/kegg-bin/show_pathway?ko04610+K03991
P11226	K03991	MBL	mannose-binding lectin	ko05150	Staphylococcus aureus infection	http://www.kegg.jp/kegg-bin/show_pathway?ko05150+K03991
P81605
B2RMS9
Q5FWF9
P02753	K18271	RBP4	retinol-binding protein 4
P05062	K01623	ALDO	fructose-bisphosphate aldolase, class I [EC:4.1.2.13;]	ko00010	Glycolysis / Gluconeogenesis	http://www.kegg.jp/kegg-bin/show_pathway?ko00010+K01623
P05062	K01623	ALDO	fructose-bisphosphate aldolase, class I [EC:4.1.2.13;]	ko00030	Pentose phosphate pathway	http://www.kegg.jp/kegg-bin/show_pathway?ko00030+K01623
P05062	K01623	ALDO	fructose-bisphosphate aldolase, class I [EC:4.1.2.13;]	ko00051	Fructose and mannose metabolism	http://www.kegg.jp/kegg-bin/show_pathway?ko00051+K01623
P05062	K01623	ALDO	fructose-bisphosphate aldolase, class I [EC:4.1.2.13;]	ko00680	Methane metabolism	http://www.kegg.jp/kegg-bin/show_pathway?ko00680+K01623
P05062	K01623	ALDO	fructose-bisphosphate aldolase, class I [EC:4.1.2.13;]	ko00710	Carbon fixation in photosynthetic organisms	http://www.kegg.jp/kegg-bin/show_pathway?ko00710+K01623
P05062	K01623	ALDO	fructose-bisphosphate aldolase, class I [EC:4.1.2.13;]	ko01200	Carbon metabolism	http://www.kegg.jp/kegg-bin/show_pathway?ko01200+K01623
P05062	K01623	ALDO	fructose-bisphosphate aldolase, class I [EC:4.1.2.13;]	ko01230	Biosynthesis of amino acids	http://www.kegg.jp/kegg-bin/show_pathway?ko01230+K01623
P37840	K04528	SNCA	alpha-synuclein	ko05010	Alzheimer's disease	http://www.kegg.jp/kegg-bin/show_pathway?ko05010+K04528
P37840	K04528	SNCA	alpha-synuclein	ko05012	Parkinson's disease	http://www.kegg.jp/kegg-bin/show_pathway?ko05012+K04528
Q86V85
C0JYY2	K14462	APOB	apolipoprotein B	ko04975	Fat digestion and absorption	http://www.kegg.jp/kegg-bin/show_pathway?ko04975+K14462
C0JYY2	K14462	APOB	apolipoprotein B	ko04977	Vitamin digestion and absorption	http://www.kegg.jp/kegg-bin/show_pathway?ko04977+K14462
A0A096LPE2	K17310	SAA	serum amyloid A protein
B3VL17	K13823	HBB	hemoglobin subunit beta	ko05143	African trypanosomiasis	http://www.kegg.jp/kegg-bin/show_pathway?ko05143+K13823
B3VL17	K13823	HBB	hemoglobin subunit beta	ko05144	Malaria	http://www.kegg.jp/kegg-bin/show_pathway?ko05144+K13823
C9JIF9	K01303	APEH	acylaminoacyl-peptidase [EC:3.4.19.1;]
A5PL32	K14480	APOL	apolipoprotein L
P14625	K09487	HSP90B, TRA1	heat shock protein 90kDa beta	ko04141	Protein processing in endoplasmic reticulum	http://www.kegg.jp/kegg-bin/show_pathway?ko04141+K09487
P14625	K09487	HSP90B, TRA1	heat shock protein 90kDa beta	ko04151	PI3K-Akt signaling pathway	http://www.kegg.jp/kegg-bin/show_pathway?ko04151+K09487
P14625	K09487	HSP90B, TRA1	heat shock protein 90kDa beta	ko04626	Plant-pathogen interaction	http://www.kegg.jp/kegg-bin/show_pathway?ko04626+K09487
P14625	K09487	HSP90B, TRA1	heat shock protein 90kDa beta	ko04657	IL-17 signaling pathway	http://www.kegg.jp/kegg-bin/show_pathway?ko04657+K09487
P14625	K09487	HSP90B, TRA1	heat shock protein 90kDa beta	ko04915	Estrogen signaling pathway	http://www.kegg.jp/kegg-bin/show_pathway?ko04915+K09487
P14625	K09487	HSP90B, TRA1	heat shock protein 90kDa beta	ko04918	Thyroid hormone synthesis	http://www.kegg.jp/kegg-bin/show_pathway?ko04918+K09487
P14625	K09487	HSP90B, TRA1	heat shock protein 90kDa beta	ko05200	Pathways in cancer	http://www.kegg.jp/kegg-bin/show_pathway?ko05200+K09487
P14625	K09487	HSP90B, TRA1	heat shock protein 90kDa beta	ko05215	Prostate cancer	http://www.kegg.jp/kegg-bin/show_pathway?ko05215+K09487
P14625	K09487	HSP90B, TRA1	heat shock protein 90kDa beta	ko05418	Fluid shear stress and atherosclerosis	http://www.kegg.jp/kegg-bin/show_pathway?ko05418+K09487
B3KQF4	K16451	TIMP1	metallopeptidase inhibitor 1	ko04066	HIF-1 signaling pathway	http://www.kegg.jp/kegg-bin/show_pathway?ko04066+K16451
A8K2X4	K06526	ENG, CD105	endoglin
P01591
P80108	K01127	E3.1.4.50	glycosylphosphatidylinositol phospholipase D [EC:3.1.4.50;]	ko00563	Glycosylphosphatidylinositol (GPI)-anchor biosynthesis	http://www.kegg.jp/kegg-bin/show_pathway?ko00563+K01127
A0A024R611	K13882	CORO1A	coronin-1A	ko04145	Phagosome	http://www.kegg.jp/kegg-bin/show_pathway?ko04145+K13882
A0A024R611	K13882	CORO1A	coronin-1A	ko05152	Tuberculosis	http://www.kegg.jp/kegg-bin/show_pathway?ko05152+K13882
Q32Q10
P02671	K03903	FGA	fibrinogen alpha chain	ko04610	Complement and coagulation cascades	http://www.kegg.jp/kegg-bin/show_pathway?ko04610+K03903
P02671	K03903	FGA	fibrinogen alpha chain	ko04611	Platelet activation	http://www.kegg.jp/kegg-bin/show_pathway?ko04611+K03903
B4E0X1	K08055	B2M	beta-2-microglobulin	ko04612	Antigen processing and presentation	http://www.kegg.jp/kegg-bin/show_pathway?ko04612+K08055
A8KAJ3	K18262	EFEMP1, FBLN3	EGF-containing fibulin-like extracellular matrix protein 1
A0A087X0M8	K06758	CHL1	L1 cell adhesion molecule like protein
O60667
P26038	K05763	MSN	moesin	ko04530	Tight junction	http://www.kegg.jp/kegg-bin/show_pathway?ko04530+K05763
P26038	K05763	MSN	moesin	ko04670	Leukocyte transendothelial migration	http://www.kegg.jp/kegg-bin/show_pathway?ko04670+K05763
P26038	K05763	MSN	moesin	ko04810	Regulation of actin cytoskeleton	http://www.kegg.jp/kegg-bin/show_pathway?ko04810+K05763
P26038	K05763	MSN	moesin	ko05162	Measles	http://www.kegg.jp/kegg-bin/show_pathway?ko05162+K05763
P26038	K05763	MSN	moesin	ko05205	Proteoglycans in cancer	http://www.kegg.jp/kegg-bin/show_pathway?ko05205+K05763
P13671	K03995	C6	complement component 6	ko04610	Complement and coagulation cascades	http://www.kegg.jp/kegg-bin/show_pathway?ko04610+K03995
P13671	K03995	C6	complement component 6	ko05020	Prion diseases	http://www.kegg.jp/kegg-bin/show_pathway?ko05020+K03995
P13671	K03995	C6	complement component 6	ko05322	Systemic lupus erythematosus	http://www.kegg.jp/kegg-bin/show_pathway?ko05322+K03995
A0A024RDT4	K17276	LCP1, PLS2	plastin-2
P08253	K01398	MMP2	matrix metalloproteinase-2 (gelatinase A) [EC:3.4.24.24;]	ko01522	Endocrine resistance	http://www.kegg.jp/kegg-bin/show_pathway?ko01522+K01398
P08253	K01398	MMP2	matrix metalloproteinase-2 (gelatinase A) [EC:3.4.24.24;]	ko04670	Leukocyte transendothelial migration	http://www.kegg.jp/kegg-bin/show_pathway?ko04670+K01398
P08253	K01398	MMP2	matrix metalloproteinase-2 (gelatinase A) [EC:3.4.24.24;]	ko04912	GnRH signaling pathway	http://www.kegg.jp/kegg-bin/show_pathway?ko04912+K01398
P08253	K01398	MMP2	matrix metalloproteinase-2 (gelatinase A) [EC:3.4.24.24;]	ko04915	Estrogen signaling pathway	http://www.kegg.jp/kegg-bin/show_pathway?ko04915+K01398
P08253	K01398	MMP2	matrix metalloproteinase-2 (gelatinase A) [EC:3.4.24.24;]	ko04933	AGE-RAGE signaling pathway in diabetic complications	http://www.kegg.jp/kegg-bin/show_pathway?ko04933+K01398
P08253	K01398	MMP2	matrix metalloproteinase-2 (gelatinase A) [EC:3.4.24.24;]	ko05200	Pathways in cancer	http://www.kegg.jp/kegg-bin/show_pathway?ko05200+K01398
P08253	K01398	MMP2	matrix metalloproteinase-2 (gelatinase A) [EC:3.4.24.24;]	ko05205	Proteoglycans in cancer	http://www.kegg.jp/kegg-bin/show_pathway?ko05205+K01398
P08253	K01398	MMP2	matrix metalloproteinase-2 (gelatinase A) [EC:3.4.24.24;]	ko05219	Bladder cancer	http://www.kegg.jp/kegg-bin/show_pathway?ko05219+K01398
P08253	K01398	MMP2	matrix metalloproteinase-2 (gelatinase A) [EC:3.4.24.24;]	ko05418	Fluid shear stress and atherosclerosis	http://www.kegg.jp/kegg-bin/show_pathway?ko05418+K01398
A0A125QYY9	K06856	IGH	immunoglobulin heavy chain	ko04020	Calcium signaling pathway	http://www.kegg.jp/kegg-bin/show_pathway?ko04020+K06856
A0A125QYY9	K06856	IGH	immunoglobulin heavy chain	ko04064	NF-kappa B signaling pathway	http://www.kegg.jp/kegg-bin/show_pathway?ko04064+K06856
A0A125QYY9	K06856	IGH	immunoglobulin heavy chain	ko04072	Phospholipase D signaling pathway	http://www.kegg.jp/kegg-bin/show_pathway?ko04072+K06856
A0A125QYY9	K06856	IGH	immunoglobulin heavy chain	ko04145	Phagosome	http://www.kegg.jp/kegg-bin/show_pathway?ko04145+K06856
A0A125QYY9	K06856	IGH	immunoglobulin heavy chain	ko04151	PI3K-Akt signaling pathway	http://www.kegg.jp/kegg-bin/show_pathway?ko04151+K06856
A0A125QYY9	K06856	IGH	immunoglobulin heavy chain	ko04640	Hematopoietic cell lineage	http://www.kegg.jp/kegg-bin/show_pathway?ko04640+K06856
A0A125QYY9	K06856	IGH	immunoglobulin heavy chain	ko04650	Natural killer cell mediated cytotoxicity	http://www.kegg.jp/kegg-bin/show_pathway?ko04650+K06856
A0A125QYY9	K06856	IGH	immunoglobulin heavy chain	ko04662	B cell receptor signaling pathway	http://www.kegg.jp/kegg-bin/show_pathway?ko04662+K06856
A0A125QYY9	K06856	IGH	immunoglobulin heavy chain	ko04664	Fc epsilon RI signaling pathway	http://www.kegg.jp/kegg-bin/show_pathway?ko04664+K06856
A0A125QYY9	K06856	IGH	immunoglobulin heavy chain	ko04666	Fc gamma R-mediated phagocytosis	http://www.kegg.jp/kegg-bin/show_pathway?ko04666+K06856
A0A125QYY9	K06856	IGH	immunoglobulin heavy chain	ko04672	Intestinal immune network for IgA production	http://www.kegg.jp/kegg-bin/show_pathway?ko04672+K06856
A0A125QYY9	K06856	IGH	immunoglobulin heavy chain	ko05140	Leishmaniasis	http://www.kegg.jp/kegg-bin/show_pathway?ko05140+K06856
A0A125QYY9	K06856	IGH	immunoglobulin heavy chain	ko05143	African trypanosomiasis	http://www.kegg.jp/kegg-bin/show_pathway?ko05143+K06856
A0A125QYY9	K06856	IGH	immunoglobulin heavy chain	ko05146	Amoebiasis	http://www.kegg.jp/kegg-bin/show_pathway?ko05146+K06856
A0A125QYY9	K06856	IGH	immunoglobulin heavy chain	ko05150	Staphylococcus aureus infection	http://www.kegg.jp/kegg-bin/show_pathway?ko05150+K06856
A0A125QYY9	K06856	IGH	immunoglobulin heavy chain	ko05152	Tuberculosis	http://www.kegg.jp/kegg-bin/show_pathway?ko05152+K06856
A0A125QYY9	K06856	IGH	immunoglobulin heavy chain	ko05162	Measles	http://www.kegg.jp/kegg-bin/show_pathway?ko05162+K06856
A0A125QYY9	K06856	IGH	immunoglobulin heavy chain	ko05169	Epstein-Barr virus infection	http://www.kegg.jp/kegg-bin/show_pathway?ko05169+K06856
A0A125QYY9	K06856	IGH	immunoglobulin heavy chain	ko05202	Transcriptional misregulation in cancer	http://www.kegg.jp/kegg-bin/show_pathway?ko05202+K06856
A0A125QYY9	K06856	IGH	immunoglobulin heavy chain	ko05310	Asthma	http://www.kegg.jp/kegg-bin/show_pathway?ko05310+K06856
A0A125QYY9	K06856	IGH	immunoglobulin heavy chain	ko05320	Autoimmune thyroid disease	http://www.kegg.jp/kegg-bin/show_pathway?ko05320+K06856
A0A125QYY9	K06856	IGH	immunoglobulin heavy chain	ko05322	Systemic lupus erythematosus	http://www.kegg.jp/kegg-bin/show_pathway?ko05322+K06856
A0A125QYY9	K06856	IGH	immunoglobulin heavy chain	ko05323	Rheumatoid arthritis	http://www.kegg.jp/kegg-bin/show_pathway?ko05323+K06856
A0A125QYY9	K06856	IGH	immunoglobulin heavy chain	ko05330	Allograft rejection	http://www.kegg.jp/kegg-bin/show_pathway?ko05330+K06856
A0A125QYY9	K06856	IGH	immunoglobulin heavy chain	ko05340	Primary immunodeficiency	http://www.kegg.jp/kegg-bin/show_pathway?ko05340+K06856
A0A125QYY9	K06856	IGH	immunoglobulin heavy chain	ko05414	Dilated cardiomyopathy	http://www.kegg.jp/kegg-bin/show_pathway?ko05414+K06856
A0A125QYY9	K06856	IGH	immunoglobulin heavy chain	ko05416	Viral myocarditis	http://www.kegg.jp/kegg-bin/show_pathway?ko05416+K06856
A0A0A0MTS2	K01810	GPI, pgi	glucose-6-phosphate isomerase [EC:5.3.1.9;]	ko00010	Glycolysis / Gluconeogenesis	http://www.kegg.jp/kegg-bin/show_pathway?ko00010+K01810
A0A0A0MTS2	K01810	GPI, pgi	glucose-6-phosphate isomerase [EC:5.3.1.9;]	ko00030	Pentose phosphate pathway	http://www.kegg.jp/kegg-bin/show_pathway?ko00030+K01810
A0A0A0MTS2	K01810	GPI, pgi	glucose-6-phosphate isomerase [EC:5.3.1.9;]	ko00500	Starch and sucrose metabolism	http://www.kegg.jp/kegg-bin/show_pathway?ko00500+K01810
A0A0A0MTS2	K01810	GPI, pgi	glucose-6-phosphate isomerase [EC:5.3.1.9;]	ko00520	Amino sugar and nucleotide sugar metabolism	http://www.kegg.jp/kegg-bin/show_pathway?ko00520+K01810
A0A0A0MTS2	K01810	GPI, pgi	glucose-6-phosphate isomerase [EC:5.3.1.9;]	ko01200	Carbon metabolism	http://www.kegg.jp/kegg-bin/show_pathway?ko01200+K01810
A6XGL1	K20731	TTR	transthyretin	ko04918	Thyroid hormone synthesis	http://www.kegg.jp/kegg-bin/show_pathway?ko04918+K20731
P63261	K05692	ACTB_G1	actin beta/gamma 1	ko04015	Rap1 signaling pathway	http://www.kegg.jp/kegg-bin/show_pathway?ko04015+K05692
P63261	K05692	ACTB_G1	actin beta/gamma 1	ko04145	Phagosome	http://www.kegg.jp/kegg-bin/show_pathway?ko04145+K05692
P63261	K05692	ACTB_G1	actin beta/gamma 1	ko04210	Apoptosis	http://www.kegg.jp/kegg-bin/show_pathway?ko04210+K05692
P63261	K05692	ACTB_G1	actin beta/gamma 1	ko04390	Hippo signaling pathway	http://www.kegg.jp/kegg-bin/show_pathway?ko04390+K05692
P63261	K05692	ACTB_G1	actin beta/gamma 1	ko04391	Hippo signaling pathway - fly	http://www.kegg.jp/kegg-bin/show_pathway?ko04391+K05692
P63261	K05692	ACTB_G1	actin beta/gamma 1	ko04510	Focal adhesion	http://www.kegg.jp/kegg-bin/show_pathway?ko04510+K05692
P63261	K05692	ACTB_G1	actin beta/gamma 1	ko04520	Adherens junction	http://www.kegg.jp/kegg-bin/show_pathway?ko04520+K05692
P63261	K05692	ACTB_G1	actin beta/gamma 1	ko04530	Tight junction	http://www.kegg.jp/kegg-bin/show_pathway?ko04530+K05692
P63261	K05692	ACTB_G1	actin beta/gamma 1	ko04611	Platelet activation	http://www.kegg.jp/kegg-bin/show_pathway?ko04611+K05692
P63261	K05692	ACTB_G1	actin beta/gamma 1	ko04670	Leukocyte transendothelial migration	http://www.kegg.jp/kegg-bin/show_pathway?ko04670+K05692
P63261	K05692	ACTB_G1	actin beta/gamma 1	ko04745	Phototransduction - fly	http://www.kegg.jp/kegg-bin/show_pathway?ko04745+K05692
P63261	K05692	ACTB_G1	actin beta/gamma 1	ko04810	Regulation of actin cytoskeleton	http://www.kegg.jp/kegg-bin/show_pathway?ko04810+K05692
P63261	K05692	ACTB_G1	actin beta/gamma 1	ko04919	Thyroid hormone signaling pathway	http://www.kegg.jp/kegg-bin/show_pathway?ko04919+K05692
P63261	K05692	ACTB_G1	actin beta/gamma 1	ko04921	Oxytocin signaling pathway	http://www.kegg.jp/kegg-bin/show_pathway?ko04921+K05692
P63261	K05692	ACTB_G1	actin beta/gamma 1	ko05100	Bacterial invasion of epithelial cells	http://www.kegg.jp/kegg-bin/show_pathway?ko05100+K05692
P63261	K05692	ACTB_G1	actin beta/gamma 1	ko05110	Vibrio cholerae infection	http://www.kegg.jp/kegg-bin/show_pathway?ko05110+K05692
P63261	K05692	ACTB_G1	actin beta/gamma 1	ko05130	Pathogenic Escherichia coli infection	http://www.kegg.jp/kegg-bin/show_pathway?ko05130+K05692
P63261	K05692	ACTB_G1	actin beta/gamma 1	ko05131	Shigellosis	http://www.kegg.jp/kegg-bin/show_pathway?ko05131+K05692
P63261	K05692	ACTB_G1	actin beta/gamma 1	ko05132	Salmonella infection	http://www.kegg.jp/kegg-bin/show_pathway?ko05132+K05692
P63261	K05692	ACTB_G1	actin beta/gamma 1	ko05164	Influenza A	http://www.kegg.jp/kegg-bin/show_pathway?ko05164+K05692
P63261	K05692	ACTB_G1	actin beta/gamma 1	ko05205	Proteoglycans in cancer	http://www.kegg.jp/kegg-bin/show_pathway?ko05205+K05692
P63261	K05692	ACTB_G1	actin beta/gamma 1	ko05410	Hypertrophic cardiomyopathy (HCM)	http://www.kegg.jp/kegg-bin/show_pathway?ko05410+K05692
P63261	K05692	ACTB_G1	actin beta/gamma 1	ko05412	Arrhythmogenic right ventricular cardiomyopathy (ARVC)	http://www.kegg.jp/kegg-bin/show_pathway?ko05412+K05692
P63261	K05692	ACTB_G1	actin beta/gamma 1	ko05414	Dilated cardiomyopathy	http://www.kegg.jp/kegg-bin/show_pathway?ko05414+K05692
P63261	K05692	ACTB_G1	actin beta/gamma 1	ko05416	Viral myocarditis	http://www.kegg.jp/kegg-bin/show_pathway?ko05416+K05692
P63261	K05692	ACTB_G1	actin beta/gamma 1	ko05418	Fluid shear stress and atherosclerosis	http://www.kegg.jp/kegg-bin/show_pathway?ko05418+K05692
P10720	K05407	PF4, CXCL4	platelet factor 4	ko04060	Cytokine-cytokine receptor interaction	http://www.kegg.jp/kegg-bin/show_pathway?ko04060+K05407
P10720	K05407	PF4, CXCL4	platelet factor 4	ko04062	Chemokine signaling pathway	http://www.kegg.jp/kegg-bin/show_pathway?ko04062+K05407
X5D7A8	K06781	CADM1, IGSF4, NECL2, TSLC1	cell adhesion molecule 1	ko04514	Cell adhesion molecules (CAMs)	http://www.kegg.jp/kegg-bin/show_pathway?ko04514+K06781
F2RM37	K01321	F9	coagulation factor IX (Christmas factor) [EC:3.4.21.22;]	ko04610	Complement and coagulation cascades	http://www.kegg.jp/kegg-bin/show_pathway?ko04610+K01321
B4DUV1	K17307	FBLN1_2	fibulin 1/2
Q6UXB8	K20412	PI16, CRISP9, CD364	peptidase inhibitor 16
C9JF17	K03098	APOD	apolipoprotein D and lipocalin family protein
Q16610
P29401	K00615	E2.2.1.1, tktA, tktB	transketolase [EC:2.2.1.1;]	ko00030	Pentose phosphate pathway	http://www.kegg.jp/kegg-bin/show_pathway?ko00030+K00615
P29401	K00615	E2.2.1.1, tktA, tktB	transketolase [EC:2.2.1.1;]	ko00710	Carbon fixation in photosynthetic organisms	http://www.kegg.jp/kegg-bin/show_pathway?ko00710+K00615
P29401	K00615	E2.2.1.1, tktA, tktB	transketolase [EC:2.2.1.1;]	ko01051	Biosynthesis of ansamycins	http://www.kegg.jp/kegg-bin/show_pathway?ko01051+K00615
P29401	K00615	E2.2.1.1, tktA, tktB	transketolase [EC:2.2.1.1;]	ko01200	Carbon metabolism	http://www.kegg.jp/kegg-bin/show_pathway?ko01200+K00615
P29401	K00615	E2.2.1.1, tktA, tktB	transketolase [EC:2.2.1.1;]	ko01230	Biosynthesis of amino acids	http://www.kegg.jp/kegg-bin/show_pathway?ko01230+K00615
E9KL23	K03984	SERPINA1, AAT	alpha-1-antitrypsin	ko04610	Complement and coagulation cascades	http://www.kegg.jp/kegg-bin/show_pathway?ko04610+K03984
P20851	K04003	C4BPB	complement component 4 binding protein, beta	ko04610	Complement and coagulation cascades	http://www.kegg.jp/kegg-bin/show_pathway?ko04610+K04003
P20851	K04003	C4BPB	complement component 4 binding protein, beta	ko05133	Pertussis	http://www.kegg.jp/kegg-bin/show_pathway?ko05133+K04003
B2R773	K07296	ACDC	adiponectin	ko03320	PPAR signaling pathway	http://www.kegg.jp/kegg-bin/show_pathway?ko03320+K07296
B2R773	K07296	ACDC	adiponectin	ko04152	AMPK signaling pathway	http://www.kegg.jp/kegg-bin/show_pathway?ko04152+K07296
B2R773	K07296	ACDC	adiponectin	ko04211	Longevity regulating pathway	http://www.kegg.jp/kegg-bin/show_pathway?ko04211+K07296
B2R773	K07296	ACDC	adiponectin	ko04920	Adipocytokine signaling pathway	http://www.kegg.jp/kegg-bin/show_pathway?ko04920+K07296
B2R773	K07296	ACDC	adiponectin	ko04930	Type II diabetes mellitus	http://www.kegg.jp/kegg-bin/show_pathway?ko04930+K07296
B2R773	K07296	ACDC	adiponectin	ko04932	Non-alcoholic fatty liver disease (NAFLD)	http://www.kegg.jp/kegg-bin/show_pathway?ko04932+K07296
Q9UL78
B4DM05	K06826	NID	nidogen (entactin)
P04278
B4E1D8	K04002	C4BPA	complement component 4 binding protein, alpha	ko04610	Complement and coagulation cascades	http://www.kegg.jp/kegg-bin/show_pathway?ko04610+K04002
B4E1D8	K04002	C4BPA	complement component 4 binding protein, alpha	ko05133	Pertussis	http://www.kegg.jp/kegg-bin/show_pathway?ko05133+K04002
A8K6C1	K16835	CETP	cholesteryl ester transfer protein
A0A024R3E3	K08757	APOA1	apolipoprotein A-I	ko03320	PPAR signaling pathway	http://www.kegg.jp/kegg-bin/show_pathway?ko03320+K08757
A0A024R3E3	K08757	APOA1	apolipoprotein A-I	ko04975	Fat digestion and absorption	http://www.kegg.jp/kegg-bin/show_pathway?ko04975+K08757
A0A024R3E3	K08757	APOA1	apolipoprotein A-I	ko04977	Vitamin digestion and absorption	http://www.kegg.jp/kegg-bin/show_pathway?ko04977+K08757
A0A024R3E3	K08757	APOA1	apolipoprotein A-I	ko05143	African trypanosomiasis	http://www.kegg.jp/kegg-bin/show_pathway?ko05143+K08757
A2NJV5
D3DRP5
Q16853	K00276	AOC3, AOC2, tynA	primary-amine oxidase [EC:1.4.3.21;]	ko00260	Glycine, serine and threonine metabolism	http://www.kegg.jp/kegg-bin/show_pathway?ko00260+K00276
Q16853	K00276	AOC3, AOC2, tynA	primary-amine oxidase [EC:1.4.3.21;]	ko00350	Tyrosine metabolism	http://www.kegg.jp/kegg-bin/show_pathway?ko00350+K00276
Q16853	K00276	AOC3, AOC2, tynA	primary-amine oxidase [EC:1.4.3.21;]	ko00360	Phenylalanine metabolism	http://www.kegg.jp/kegg-bin/show_pathway?ko00360+K00276
Q16853	K00276	AOC3, AOC2, tynA	primary-amine oxidase [EC:1.4.3.21;]	ko00410	beta-Alanine metabolism	http://www.kegg.jp/kegg-bin/show_pathway?ko00410+K00276
Q16853	K00276	AOC3, AOC2, tynA	primary-amine oxidase [EC:1.4.3.21;]	ko00950	Isoquinoline alkaloid biosynthesis	http://www.kegg.jp/kegg-bin/show_pathway?ko00950+K00276
Q16853	K00276	AOC3, AOC2, tynA	primary-amine oxidase [EC:1.4.3.21;]	ko00960	Tropane, piperidine and pyridine alkaloid biosynthesis	http://www.kegg.jp/kegg-bin/show_pathway?ko00960+K00276
A0A024R0A1	K05453	CSF1, MCSF	macrophage colony-stimulating factor 1	ko04014	Ras signaling pathway	http://www.kegg.jp/kegg-bin/show_pathway?ko04014+K05453
A0A024R0A1	K05453	CSF1, MCSF	macrophage colony-stimulating factor 1	ko04015	Rap1 signaling pathway	http://www.kegg.jp/kegg-bin/show_pathway?ko04015+K05453
A0A024R0A1	K05453	CSF1, MCSF	macrophage colony-stimulating factor 1	ko04060	Cytokine-cytokine receptor interaction	http://www.kegg.jp/kegg-bin/show_pathway?ko04060+K05453
A0A024R0A1	K05453	CSF1, MCSF	macrophage colony-stimulating factor 1	ko04151	PI3K-Akt signaling pathway	http://www.kegg.jp/kegg-bin/show_pathway?ko04151+K05453
A0A024R0A1	K05453	CSF1, MCSF	macrophage colony-stimulating factor 1	ko04380	Osteoclast differentiation	http://www.kegg.jp/kegg-bin/show_pathway?ko04380+K05453
A0A024R0A1	K05453	CSF1, MCSF	macrophage colony-stimulating factor 1	ko04640	Hematopoietic cell lineage	http://www.kegg.jp/kegg-bin/show_pathway?ko04640+K05453
A0A024R0A1	K05453	CSF1, MCSF	macrophage colony-stimulating factor 1	ko04668	TNF signaling pathway	http://www.kegg.jp/kegg-bin/show_pathway?ko04668+K05453
A0A024R0A1	K05453	CSF1, MCSF	macrophage colony-stimulating factor 1	ko05323	Rheumatoid arthritis	http://www.kegg.jp/kegg-bin/show_pathway?ko05323+K05453
A0A024R9Q1	K16857	THBS1	thrombospondin 1	ko04015	Rap1 signaling pathway	http://www.kegg.jp/kegg-bin/show_pathway?ko04015+K16857
A0A024R9Q1	K16857	THBS1	thrombospondin 1	ko04115	p53 signaling pathway	http://www.kegg.jp/kegg-bin/show_pathway?ko04115+K16857
A0A024R9Q1	K16857	THBS1	thrombospondin 1	ko04145	Phagosome	http://www.kegg.jp/kegg-bin/show_pathway?ko04145+K16857
A0A024R9Q1	K16857	THBS1	thrombospondin 1	ko04151	PI3K-Akt signaling pathway	http://www.kegg.jp/kegg-bin/show_pathway?ko04151+K16857
A0A024R9Q1	K16857	THBS1	thrombospondin 1	ko04350	TGF-beta signaling pathway	http://www.kegg.jp/kegg-bin/show_pathway?ko04350+K16857
A0A024R9Q1	K16857	THBS1	thrombospondin 1	ko04510	Focal adhesion	http://www.kegg.jp/kegg-bin/show_pathway?ko04510+K16857
A0A024R9Q1	K16857	THBS1	thrombospondin 1	ko04512	ECM-receptor interaction	http://www.kegg.jp/kegg-bin/show_pathway?ko04512+K16857
A0A024R9Q1	K16857	THBS1	thrombospondin 1	ko05144	Malaria	http://www.kegg.jp/kegg-bin/show_pathway?ko05144+K16857
A0A024R9Q1	K16857	THBS1	thrombospondin 1	ko05205	Proteoglycans in cancer	http://www.kegg.jp/kegg-bin/show_pathway?ko05205+K16857
A0A024R9Q1	K16857	THBS1	thrombospondin 1	ko05206	MicroRNAs in cancer	http://www.kegg.jp/kegg-bin/show_pathway?ko05206+K16857
A0A024R9Q1	K16857	THBS1	thrombospondin 1	ko05219	Bladder cancer	http://www.kegg.jp/kegg-bin/show_pathway?ko05219+K16857
A0A1B1CYC9
A0A120HG46	K06856	IGH	immunoglobulin heavy chain	ko04020	Calcium signaling pathway	http://www.kegg.jp/kegg-bin/show_pathway?ko04020+K06856
A0A120HG46	K06856	IGH	immunoglobulin heavy chain	ko04064	NF-kappa B signaling pathway	http://www.kegg.jp/kegg-bin/show_pathway?ko04064+K06856
A0A120HG46	K06856	IGH	immunoglobulin heavy chain	ko04072	Phospholipase D signaling pathway	http://www.kegg.jp/kegg-bin/show_pathway?ko04072+K06856
A0A120HG46	K06856	IGH	immunoglobulin heavy chain	ko04145	Phagosome	http://www.kegg.jp/kegg-bin/show_pathway?ko04145+K06856
A0A120HG46	K06856	IGH	immunoglobulin heavy chain	ko04151	PI3K-Akt signaling pathway	http://www.kegg.jp/kegg-bin/show_pathway?ko04151+K06856
A0A120HG46	K06856	IGH	immunoglobulin heavy chain	ko04640	Hematopoietic cell lineage	http://www.kegg.jp/kegg-bin/show_pathway?ko04640+K06856
A0A120HG46	K06856	IGH	immunoglobulin heavy chain	ko04650	Natural killer cell mediated cytotoxicity	http://www.kegg.jp/kegg-bin/show_pathway?ko04650+K06856
A0A120HG46	K06856	IGH	immunoglobulin heavy chain	ko04662	B cell receptor signaling pathway	http://www.kegg.jp/kegg-bin/show_pathway?ko04662+K06856
A0A120HG46	K06856	IGH	immunoglobulin heavy chain	ko04664	Fc epsilon RI signaling pathway	http://www.kegg.jp/kegg-bin/show_pathway?ko04664+K06856
A0A120HG46	K06856	IGH	immunoglobulin heavy chain	ko04666	Fc gamma R-mediated phagocytosis	http://www.kegg.jp/kegg-bin/show_pathway?ko04666+K06856
A0A120HG46	K06856	IGH	immunoglobulin heavy chain	ko04672	Intestinal immune network for IgA production	http://www.kegg.jp/kegg-bin/show_pathway?ko04672+K06856
A0A120HG46	K06856	IGH	immunoglobulin heavy chain	ko05140	Leishmaniasis	http://www.kegg.jp/kegg-bin/show_pathway?ko05140+K06856
A0A120HG46	K06856	IGH	immunoglobulin heavy chain	ko05143	African trypanosomiasis	http://www.kegg.jp/kegg-bin/show_pathway?ko05143+K06856
A0A120HG46	K06856	IGH	immunoglobulin heavy chain	ko05146	Amoebiasis	http://www.kegg.jp/kegg-bin/show_pathway?ko05146+K06856
A0A120HG46	K06856	IGH	immunoglobulin heavy chain	ko05150	Staphylococcus aureus infection	http://www.kegg.jp/kegg-bin/show_pathway?ko05150+K06856
A0A120HG46	K06856	IGH	immunoglobulin heavy chain	ko05152	Tuberculosis	http://www.kegg.jp/kegg-bin/show_pathway?ko05152+K06856
A0A120HG46	K06856	IGH	immunoglobulin heavy chain	ko05162	Measles	http://www.kegg.jp/kegg-bin/show_pathway?ko05162+K06856
A0A120HG46	K06856	IGH	immunoglobulin heavy chain	ko05169	Epstein-Barr virus infection	http://www.kegg.jp/kegg-bin/show_pathway?ko05169+K06856
A0A120HG46	K06856	IGH	immunoglobulin heavy chain	ko05202	Transcriptional misregulation in cancer	http://www.kegg.jp/kegg-bin/show_pathway?ko05202+K06856
A0A120HG46	K06856	IGH	immunoglobulin heavy chain	ko05310	Asthma	http://www.kegg.jp/kegg-bin/show_pathway?ko05310+K06856
A0A120HG46	K06856	IGH	immunoglobulin heavy chain	ko05320	Autoimmune thyroid disease	http://www.kegg.jp/kegg-bin/show_pathway?ko05320+K06856
A0A120HG46	K06856	IGH	immunoglobulin heavy chain	ko05322	Systemic lupus erythematosus	http://www.kegg.jp/kegg-bin/show_pathway?ko05322+K06856
A0A120HG46	K06856	IGH	immunoglobulin heavy chain	ko05323	Rheumatoid arthritis	http://www.kegg.jp/kegg-bin/show_pathway?ko05323+K06856
A0A120HG46	K06856	IGH	immunoglobulin heavy chain	ko05330	Allograft rejection	http://www.kegg.jp/kegg-bin/show_pathway?ko05330+K06856
A0A120HG46	K06856	IGH	immunoglobulin heavy chain	ko05340	Primary immunodeficiency	http://www.kegg.jp/kegg-bin/show_pathway?ko05340+K06856
A0A120HG46	K06856	IGH	immunoglobulin heavy chain	ko05414	Dilated cardiomyopathy	http://www.kegg.jp/kegg-bin/show_pathway?ko05414+K06856
A0A120HG46	K06856	IGH	immunoglobulin heavy chain	ko05416	Viral myocarditis	http://www.kegg.jp/kegg-bin/show_pathway?ko05416+K06856
A0A0D9SG04
Q6PIL8
Q9HCC1	K06856	IGH	immunoglobulin heavy chain	ko04020	Calcium signaling pathway	http://www.kegg.jp/kegg-bin/show_pathway?ko04020+K06856
Q9HCC1	K06856	IGH	immunoglobulin heavy chain	ko04064	NF-kappa B signaling pathway	http://www.kegg.jp/kegg-bin/show_pathway?ko04064+K06856
Q9HCC1	K06856	IGH	immunoglobulin heavy chain	ko04072	Phospholipase D signaling pathway	http://www.kegg.jp/kegg-bin/show_pathway?ko04072+K06856
Q9HCC1	K06856	IGH	immunoglobulin heavy chain	ko04145	Phagosome	http://www.kegg.jp/kegg-bin/show_pathway?ko04145+K06856
Q9HCC1	K06856	IGH	immunoglobulin heavy chain	ko04151	PI3K-Akt signaling pathway	http://www.kegg.jp/kegg-bin/show_pathway?ko04151+K06856
Q9HCC1	K06856	IGH	immunoglobulin heavy chain	ko04640	Hematopoietic cell lineage	http://www.kegg.jp/kegg-bin/show_pathway?ko04640+K06856
Q9HCC1	K06856	IGH	immunoglobulin heavy chain	ko04650	Natural killer cell mediated cytotoxicity	http://www.kegg.jp/kegg-bin/show_pathway?ko04650+K06856
Q9HCC1	K06856	IGH	immunoglobulin heavy chain	ko04662	B cell receptor signaling pathway	http://www.kegg.jp/kegg-bin/show_pathway?ko04662+K06856
Q9HCC1	K06856	IGH	immunoglobulin heavy chain	ko04664	Fc epsilon RI signaling pathway	http://www.kegg.jp/kegg-bin/show_pathway?ko04664+K06856
Q9HCC1	K06856	IGH	immunoglobulin heavy chain	ko04666	Fc gamma R-mediated phagocytosis	http://www.kegg.jp/kegg-bin/show_pathway?ko04666+K06856
Q9HCC1	K06856	IGH	immunoglobulin heavy chain	ko04672	Intestinal immune network for IgA production	http://www.kegg.jp/kegg-bin/show_pathway?ko04672+K06856
Q9HCC1	K06856	IGH	immunoglobulin heavy chain	ko05140	Leishmaniasis	http://www.kegg.jp/kegg-bin/show_pathway?ko05140+K06856
Q9HCC1	K06856	IGH	immunoglobulin heavy chain	ko05143	African trypanosomiasis	http://www.kegg.jp/kegg-bin/show_pathway?ko05143+K06856
Q9HCC1	K06856	IGH	immunoglobulin heavy chain	ko05146	Amoebiasis	http://www.kegg.jp/kegg-bin/show_pathway?ko05146+K06856
Q9HCC1	K06856	IGH	immunoglobulin heavy chain	ko05150	Staphylococcus aureus infection	http://www.kegg.jp/kegg-bin/show_pathway?ko05150+K06856
Q9HCC1	K06856	IGH	immunoglobulin heavy chain	ko05152	Tuberculosis	http://www.kegg.jp/kegg-bin/show_pathway?ko05152+K06856
Q9HCC1	K06856	IGH	immunoglobulin heavy chain	ko05162	Measles	http://www.kegg.jp/kegg-bin/show_pathway?ko05162+K06856
Q9HCC1	K06856	IGH	immunoglobulin heavy chain	ko05169	Epstein-Barr virus infection	http://www.kegg.jp/kegg-bin/show_pathway?ko05169+K06856
Q9HCC1	K06856	IGH	immunoglobulin heavy chain	ko05202	Transcriptional misregulation in cancer	http://www.kegg.jp/kegg-bin/show_pathway?ko05202+K06856
Q9HCC1	K06856	IGH	immunoglobulin heavy chain	ko05310	Asthma	http://www.kegg.jp/kegg-bin/show_pathway?ko05310+K06856
Q9HCC1	K06856	IGH	immunoglobulin heavy chain	ko05320	Autoimmune thyroid disease	http://www.kegg.jp/kegg-bin/show_pathway?ko05320+K06856
Q9HCC1	K06856	IGH	immunoglobulin heavy chain	ko05322	Systemic lupus erythematosus	http://www.kegg.jp/kegg-bin/show_pathway?ko05322+K06856
Q9HCC1	K06856	IGH	immunoglobulin heavy chain	ko05323	Rheumatoid arthritis	http://www.kegg.jp/kegg-bin/show_pathway?ko05323+K06856
Q9HCC1	K06856	IGH	immunoglobulin heavy chain	ko05330	Allograft rejection	http://www.kegg.jp/kegg-bin/show_pathway?ko05330+K06856
Q9HCC1	K06856	IGH	immunoglobulin heavy chain	ko05340	Primary immunodeficiency	http://www.kegg.jp/kegg-bin/show_pathway?ko05340+K06856
Q9HCC1	K06856	IGH	immunoglobulin heavy chain	ko05414	Dilated cardiomyopathy	http://www.kegg.jp/kegg-bin/show_pathway?ko05414+K06856
Q9HCC1	K06856	IGH	immunoglobulin heavy chain	ko05416	Viral myocarditis	http://www.kegg.jp/kegg-bin/show_pathway?ko05416+K06856
A0A0F7TAV4	K06856	IGH	immunoglobulin heavy chain	ko04020	Calcium signaling pathway	http://www.kegg.jp/kegg-bin/show_pathway?ko04020+K06856
A0A0F7TAV4	K06856	IGH	immunoglobulin heavy chain	ko04064	NF-kappa B signaling pathway	http://www.kegg.jp/kegg-bin/show_pathway?ko04064+K06856
A0A0F7TAV4	K06856	IGH	immunoglobulin heavy chain	ko04072	Phospholipase D signaling pathway	http://www.kegg.jp/kegg-bin/show_pathway?ko04072+K06856
A0A0F7TAV4	K06856	IGH	immunoglobulin heavy chain	ko04145	Phagosome	http://www.kegg.jp/kegg-bin/show_pathway?ko04145+K06856
A0A0F7TAV4	K06856	IGH	immunoglobulin heavy chain	ko04151	PI3K-Akt signaling pathway	http://www.kegg.jp/kegg-bin/show_pathway?ko04151+K06856
A0A0F7TAV4	K06856	IGH	immunoglobulin heavy chain	ko04640	Hematopoietic cell lineage	http://www.kegg.jp/kegg-bin/show_pathway?ko04640+K06856
A0A0F7TAV4	K06856	IGH	immunoglobulin heavy chain	ko04650	Natural killer cell mediated cytotoxicity	http://www.kegg.jp/kegg-bin/show_pathway?ko04650+K06856
A0A0F7TAV4	K06856	IGH	immunoglobulin heavy chain	ko04662	B cell receptor signaling pathway	http://www.kegg.jp/kegg-bin/show_pathway?ko04662+K06856
A0A0F7TAV4	K06856	IGH	immunoglobulin heavy chain	ko04664	Fc epsilon RI signaling pathway	http://www.kegg.jp/kegg-bin/show_pathway?ko04664+K06856
A0A0F7TAV4	K06856	IGH	immunoglobulin heavy chain	ko04666	Fc gamma R-mediated phagocytosis	http://www.kegg.jp/kegg-bin/show_pathway?ko04666+K06856
A0A0F7TAV4	K06856	IGH	immunoglobulin heavy chain	ko04672	Intestinal immune network for IgA production	http://www.kegg.jp/kegg-bin/show_pathway?ko04672+K06856
A0A0F7TAV4	K06856	IGH	immunoglobulin heavy chain	ko05140	Leishmaniasis	http://www.kegg.jp/kegg-bin/show_pathway?ko05140+K06856
A0A0F7TAV4	K06856	IGH	immunoglobulin heavy chain	ko05143	African trypanosomiasis	http://www.kegg.jp/kegg-bin/show_pathway?ko05143+K06856
A0A0F7TAV4	K06856	IGH	immunoglobulin heavy chain	ko05146	Amoebiasis	http://www.kegg.jp/kegg-bin/show_pathway?ko05146+K06856
A0A0F7TAV4	K06856	IGH	immunoglobulin heavy chain	ko05150	Staphylococcus aureus infection	http://www.kegg.jp/kegg-bin/show_pathway?ko05150+K06856
A0A0F7TAV4	K06856	IGH	immunoglobulin heavy chain	ko05152	Tuberculosis	http://www.kegg.jp/kegg-bin/show_pathway?ko05152+K06856
A0A0F7TAV4	K06856	IGH	immunoglobulin heavy chain	ko05162	Measles	http://www.kegg.jp/kegg-bin/show_pathway?ko05162+K06856
A0A0F7TAV4	K06856	IGH	immunoglobulin heavy chain	ko05169	Epstein-Barr virus infection	http://www.kegg.jp/kegg-bin/show_pathway?ko05169+K06856
A0A0F7TAV4	K06856	IGH	immunoglobulin heavy chain	ko05202	Transcriptional misregulation in cancer	http://www.kegg.jp/kegg-bin/show_pathway?ko05202+K06856
A0A0F7TAV4	K06856	IGH	immunoglobulin heavy chain	ko05310	Asthma	http://www.kegg.jp/kegg-bin/show_pathway?ko05310+K06856
A0A0F7TAV4	K06856	IGH	immunoglobulin heavy chain	ko05320	Autoimmune thyroid disease	http://www.kegg.jp/kegg-bin/show_pathway?ko05320+K06856
A0A0F7TAV4	K06856	IGH	immunoglobulin heavy chain	ko05322	Systemic lupus erythematosus	http://www.kegg.jp/kegg-bin/show_pathway?ko05322+K06856
A0A0F7TAV4	K06856	IGH	immunoglobulin heavy chain	ko05323	Rheumatoid arthritis	http://www.kegg.jp/kegg-bin/show_pathway?ko05323+K06856
A0A0F7TAV4	K06856	IGH	immunoglobulin heavy chain	ko05330	Allograft rejection	http://www.kegg.jp/kegg-bin/show_pathway?ko05330+K06856
A0A0F7TAV4	K06856	IGH	immunoglobulin heavy chain	ko05340	Primary immunodeficiency	http://www.kegg.jp/kegg-bin/show_pathway?ko05340+K06856
A0A0F7TAV4	K06856	IGH	immunoglobulin heavy chain	ko05414	Dilated cardiomyopathy	http://www.kegg.jp/kegg-bin/show_pathway?ko05414+K06856
A0A0F7TAV4	K06856	IGH	immunoglobulin heavy chain	ko05416	Viral myocarditis	http://www.kegg.jp/kegg-bin/show_pathway?ko05416+K06856
A0A075B6R9
P19652	K17308	ORM1, AGP1	alpha-1-acid glycoprotein 1
H0Y858	K10161	TLR9, CD289	toll-like receptor 9	ko04620	Toll-like receptor signaling pathway	http://www.kegg.jp/kegg-bin/show_pathway?ko04620+K10161
H0Y858	K10161	TLR9, CD289	toll-like receptor 9	ko05142	Chagas disease (American trypanosomiasis)	http://www.kegg.jp/kegg-bin/show_pathway?ko05142+K10161
H0Y858	K10161	TLR9, CD289	toll-like receptor 9	ko05143	African trypanosomiasis	http://www.kegg.jp/kegg-bin/show_pathway?ko05143+K10161
H0Y858	K10161	TLR9, CD289	toll-like receptor 9	ko05144	Malaria	http://www.kegg.jp/kegg-bin/show_pathway?ko05144+K10161
H0Y858	K10161	TLR9, CD289	toll-like receptor 9	ko05152	Tuberculosis	http://www.kegg.jp/kegg-bin/show_pathway?ko05152+K10161
H0Y858	K10161	TLR9, CD289	toll-like receptor 9	ko05162	Measles	http://www.kegg.jp/kegg-bin/show_pathway?ko05162+K10161
H0Y858	K10161	TLR9, CD289	toll-like receptor 9	ko05168	Herpes simplex infection	http://www.kegg.jp/kegg-bin/show_pathway?ko05168+K10161
A0A068LL60	K06856	IGH	immunoglobulin heavy chain	ko04020	Calcium signaling pathway	http://www.kegg.jp/kegg-bin/show_pathway?ko04020+K06856
A0A068LL60	K06856	IGH	immunoglobulin heavy chain	ko04064	NF-kappa B signaling pathway	http://www.kegg.jp/kegg-bin/show_pathway?ko04064+K06856
A0A068LL60	K06856	IGH	immunoglobulin heavy chain	ko04072	Phospholipase D signaling pathway	http://www.kegg.jp/kegg-bin/show_pathway?ko04072+K06856
A0A068LL60	K06856	IGH	immunoglobulin heavy chain	ko04145	Phagosome	http://www.kegg.jp/kegg-bin/show_pathway?ko04145+K06856
A0A068LL60	K06856	IGH	immunoglobulin heavy chain	ko04151	PI3K-Akt signaling pathway	http://www.kegg.jp/kegg-bin/show_pathway?ko04151+K06856
A0A068LL60	K06856	IGH	immunoglobulin heavy chain	ko04640	Hematopoietic cell lineage	http://www.kegg.jp/kegg-bin/show_pathway?ko04640+K06856
A0A068LL60	K06856	IGH	immunoglobulin heavy chain	ko04650	Natural killer cell mediated cytotoxicity	http://www.kegg.jp/kegg-bin/show_pathway?ko04650+K06856
A0A068LL60	K06856	IGH	immunoglobulin heavy chain	ko04662	B cell receptor signaling pathway	http://www.kegg.jp/kegg-bin/show_pathway?ko04662+K06856
A0A068LL60	K06856	IGH	immunoglobulin heavy chain	ko04664	Fc epsilon RI signaling pathway	http://www.kegg.jp/kegg-bin/show_pathway?ko04664+K06856
A0A068LL60	K06856	IGH	immunoglobulin heavy chain	ko04666	Fc gamma R-mediated phagocytosis	http://www.kegg.jp/kegg-bin/show_pathway?ko04666+K06856
A0A068LL60	K06856	IGH	immunoglobulin heavy chain	ko04672	Intestinal immune network for IgA production	http://www.kegg.jp/kegg-bin/show_pathway?ko04672+K06856
A0A068LL60	K06856	IGH	immunoglobulin heavy chain	ko05140	Leishmaniasis	http://www.kegg.jp/kegg-bin/show_pathway?ko05140+K06856
A0A068LL60	K06856	IGH	immunoglobulin heavy chain	ko05143	African trypanosomiasis	http://www.kegg.jp/kegg-bin/show_pathway?ko05143+K06856
A0A068LL60	K06856	IGH	immunoglobulin heavy chain	ko05146	Amoebiasis	http://www.kegg.jp/kegg-bin/show_pathway?ko05146+K06856
A0A068LL60	K06856	IGH	immunoglobulin heavy chain	ko05150	Staphylococcus aureus infection	http://www.kegg.jp/kegg-bin/show_pathway?ko05150+K06856
A0A068LL60	K06856	IGH	immunoglobulin heavy chain	ko05152	Tuberculosis	http://www.kegg.jp/kegg-bin/show_pathway?ko05152+K06856
A0A068LL60	K06856	IGH	immunoglobulin heavy chain	ko05162	Measles	http://www.kegg.jp/kegg-bin/show_pathway?ko05162+K06856
A0A068LL60	K06856	IGH	immunoglobulin heavy chain	ko05169	Epstein-Barr virus infection	http://www.kegg.jp/kegg-bin/show_pathway?ko05169+K06856
A0A068LL60	K06856	IGH	immunoglobulin heavy chain	ko05202	Transcriptional misregulation in cancer	http://www.kegg.jp/kegg-bin/show_pathway?ko05202+K06856
A0A068LL60	K06856	IGH	immunoglobulin heavy chain	ko05310	Asthma	http://www.kegg.jp/kegg-bin/show_pathway?ko05310+K06856
A0A068LL60	K06856	IGH	immunoglobulin heavy chain	ko05320	Autoimmune thyroid disease	http://www.kegg.jp/kegg-bin/show_pathway?ko05320+K06856
A0A068LL60	K06856	IGH	immunoglobulin heavy chain	ko05322	Systemic lupus erythematosus	http://www.kegg.jp/kegg-bin/show_pathway?ko05322+K06856
A0A068LL60	K06856	IGH	immunoglobulin heavy chain	ko05323	Rheumatoid arthritis	http://www.kegg.jp/kegg-bin/show_pathway?ko05323+K06856
A0A068LL60	K06856	IGH	immunoglobulin heavy chain	ko05330	Allograft rejection	http://www.kegg.jp/kegg-bin/show_pathway?ko05330+K06856
A0A068LL60	K06856	IGH	immunoglobulin heavy chain	ko05340	Primary immunodeficiency	http://www.kegg.jp/kegg-bin/show_pathway?ko05340+K06856
A0A068LL60	K06856	IGH	immunoglobulin heavy chain	ko05414	Dilated cardiomyopathy	http://www.kegg.jp/kegg-bin/show_pathway?ko05414+K06856
A0A068LL60	K06856	IGH	immunoglobulin heavy chain	ko05416	Viral myocarditis	http://www.kegg.jp/kegg-bin/show_pathway?ko05416+K06856
Q9NPP6	K06856	IGH	immunoglobulin heavy chain	ko04020	Calcium signaling pathway	http://www.kegg.jp/kegg-bin/show_pathway?ko04020+K06856
Q9NPP6	K06856	IGH	immunoglobulin heavy chain	ko04064	NF-kappa B signaling pathway	http://www.kegg.jp/kegg-bin/show_pathway?ko04064+K06856
Q9NPP6	K06856	IGH	immunoglobulin heavy chain	ko04072	Phospholipase D signaling pathway	http://www.kegg.jp/kegg-bin/show_pathway?ko04072+K06856
Q9NPP6	K06856	IGH	immunoglobulin heavy chain	ko04145	Phagosome	http://www.kegg.jp/kegg-bin/show_pathway?ko04145+K06856
Q9NPP6	K06856	IGH	immunoglobulin heavy chain	ko04151	PI3K-Akt signaling pathway	http://www.kegg.jp/kegg-bin/show_pathway?ko04151+K06856
Q9NPP6	K06856	IGH	immunoglobulin heavy chain	ko04640	Hematopoietic cell lineage	http://www.kegg.jp/kegg-bin/show_pathway?ko04640+K06856
Q9NPP6	K06856	IGH	immunoglobulin heavy chain	ko04650	Natural killer cell mediated cytotoxicity	http://www.kegg.jp/kegg-bin/show_pathway?ko04650+K06856
Q9NPP6	K06856	IGH	immunoglobulin heavy chain	ko04662	B cell receptor signaling pathway	http://www.kegg.jp/kegg-bin/show_pathway?ko04662+K06856
Q9NPP6	K06856	IGH	immunoglobulin heavy chain	ko04664	Fc epsilon RI signaling pathway	http://www.kegg.jp/kegg-bin/show_pathway?ko04664+K06856
Q9NPP6	K06856	IGH	immunoglobulin heavy chain	ko04666	Fc gamma R-mediated phagocytosis	http://www.kegg.jp/kegg-bin/show_pathway?ko04666+K06856
Q9NPP6	K06856	IGH	immunoglobulin heavy chain	ko04672	Intestinal immune network for IgA production	http://www.kegg.jp/kegg-bin/show_pathway?ko04672+K06856
Q9NPP6	K06856	IGH	immunoglobulin heavy chain	ko05140	Leishmaniasis	http://www.kegg.jp/kegg-bin/show_pathway?ko05140+K06856
Q9NPP6	K06856	IGH	immunoglobulin heavy chain	ko05143	African trypanosomiasis	http://www.kegg.jp/kegg-bin/show_pathway?ko05143+K06856
Q9NPP6	K06856	IGH	immunoglobulin heavy chain	ko05146	Amoebiasis	http://www.kegg.jp/kegg-bin/show_pathway?ko05146+K06856
Q9NPP6	K06856	IGH	immunoglobulin heavy chain	ko05150	Staphylococcus aureus infection	http://www.kegg.jp/kegg-bin/show_pathway?ko05150+K06856
Q9NPP6	K06856	IGH	immunoglobulin heavy chain	ko05152	Tuberculosis	http://www.kegg.jp/kegg-bin/show_pathway?ko05152+K06856
Q9NPP6	K06856	IGH	immunoglobulin heavy chain	ko05162	Measles	http://www.kegg.jp/kegg-bin/show_pathway?ko05162+K06856
Q9NPP6	K06856	IGH	immunoglobulin heavy chain	ko05169	Epstein-Barr virus infection	http://www.kegg.jp/kegg-bin/show_pathway?ko05169+K06856
Q9NPP6	K06856	IGH	immunoglobulin heavy chain	ko05202	Transcriptional misregulation in cancer	http://www.kegg.jp/kegg-bin/show_pathway?ko05202+K06856
Q9NPP6	K06856	IGH	immunoglobulin heavy chain	ko05310	Asthma	http://www.kegg.jp/kegg-bin/show_pathway?ko05310+K06856
Q9NPP6	K06856	IGH	immunoglobulin heavy chain	ko05320	Autoimmune thyroid disease	http://www.kegg.jp/kegg-bin/show_pathway?ko05320+K06856
Q9NPP6	K06856	IGH	immunoglobulin heavy chain	ko05322	Systemic lupus erythematosus	http://www.kegg.jp/kegg-bin/show_pathway?ko05322+K06856
Q9NPP6	K06856	IGH	immunoglobulin heavy chain	ko05323	Rheumatoid arthritis	http://www.kegg.jp/kegg-bin/show_pathway?ko05323+K06856
Q9NPP6	K06856	IGH	immunoglobulin heavy chain	ko05330	Allograft rejection	http://www.kegg.jp/kegg-bin/show_pathway?ko05330+K06856
Q9NPP6	K06856	IGH	immunoglobulin heavy chain	ko05340	Primary immunodeficiency	http://www.kegg.jp/kegg-bin/show_pathway?ko05340+K06856
Q9NPP6	K06856	IGH	immunoglobulin heavy chain	ko05414	Dilated cardiomyopathy	http://www.kegg.jp/kegg-bin/show_pathway?ko05414+K06856
Q9NPP6	K06856	IGH	immunoglobulin heavy chain	ko05416	Viral myocarditis	http://www.kegg.jp/kegg-bin/show_pathway?ko05416+K06856
Q6N091	K06856	IGH	immunoglobulin heavy chain	ko04020	Calcium signaling pathway	http://www.kegg.jp/kegg-bin/show_pathway?ko04020+K06856
Q6N091	K06856	IGH	immunoglobulin heavy chain	ko04064	NF-kappa B signaling pathway	http://www.kegg.jp/kegg-bin/show_pathway?ko04064+K06856
Q6N091	K06856	IGH	immunoglobulin heavy chain	ko04072	Phospholipase D signaling pathway	http://www.kegg.jp/kegg-bin/show_pathway?ko04072+K06856
Q6N091	K06856	IGH	immunoglobulin heavy chain	ko04145	Phagosome	http://www.kegg.jp/kegg-bin/show_pathway?ko04145+K06856
Q6N091	K06856	IGH	immunoglobulin heavy chain	ko04151	PI3K-Akt signaling pathway	http://www.kegg.jp/kegg-bin/show_pathway?ko04151+K06856
Q6N091	K06856	IGH	immunoglobulin heavy chain	ko04640	Hematopoietic cell lineage	http://www.kegg.jp/kegg-bin/show_pathway?ko04640+K06856
Q6N091	K06856	IGH	immunoglobulin heavy chain	ko04650	Natural killer cell mediated cytotoxicity	http://www.kegg.jp/kegg-bin/show_pathway?ko04650+K06856
Q6N091	K06856	IGH	immunoglobulin heavy chain	ko04662	B cell receptor signaling pathway	http://www.kegg.jp/kegg-bin/show_pathway?ko04662+K06856
Q6N091	K06856	IGH	immunoglobulin heavy chain	ko04664	Fc epsilon RI signaling pathway	http://www.kegg.jp/kegg-bin/show_pathway?ko04664+K06856
Q6N091	K06856	IGH	immunoglobulin heavy chain	ko04666	Fc gamma R-mediated phagocytosis	http://www.kegg.jp/kegg-bin/show_pathway?ko04666+K06856
Q6N091	K06856	IGH	immunoglobulin heavy chain	ko04672	Intestinal immune network for IgA production	http://www.kegg.jp/kegg-bin/show_pathway?ko04672+K06856
Q6N091	K06856	IGH	immunoglobulin heavy chain	ko05140	Leishmaniasis	http://www.kegg.jp/kegg-bin/show_pathway?ko05140+K06856
Q6N091	K06856	IGH	immunoglobulin heavy chain	ko05143	African trypanosomiasis	http://www.kegg.jp/kegg-bin/show_pathway?ko05143+K06856
Q6N091	K06856	IGH	immunoglobulin heavy chain	ko05146	Amoebiasis	http://www.kegg.jp/kegg-bin/show_pathway?ko05146+K06856
Q6N091	K06856	IGH	immunoglobulin heavy chain	ko05150	Staphylococcus aureus infection	http://www.kegg.jp/kegg-bin/show_pathway?ko05150+K06856
Q6N091	K06856	IGH	immunoglobulin heavy chain	ko05152	Tuberculosis	http://www.kegg.jp/kegg-bin/show_pathway?ko05152+K06856
Q6N091	K06856	IGH	immunoglobulin heavy chain	ko05162	Measles	http://www.kegg.jp/kegg-bin/show_pathway?ko05162+K06856
Q6N091	K06856	IGH	immunoglobulin heavy chain	ko05169	Epstein-Barr virus infection	http://www.kegg.jp/kegg-bin/show_pathway?ko05169+K06856
Q6N091	K06856	IGH	immunoglobulin heavy chain	ko05202	Transcriptional misregulation in cancer	http://www.kegg.jp/kegg-bin/show_pathway?ko05202+K06856
Q6N091	K06856	IGH	immunoglobulin heavy chain	ko05310	Asthma	http://www.kegg.jp/kegg-bin/show_pathway?ko05310+K06856
Q6N091	K06856	IGH	immunoglobulin heavy chain	ko05320	Autoimmune thyroid disease	http://www.kegg.jp/kegg-bin/show_pathway?ko05320+K06856
Q6N091	K06856	IGH	immunoglobulin heavy chain	ko05322	Systemic lupus erythematosus	http://www.kegg.jp/kegg-bin/show_pathway?ko05322+K06856
Q6N091	K06856	IGH	immunoglobulin heavy chain	ko05323	Rheumatoid arthritis	http://www.kegg.jp/kegg-bin/show_pathway?ko05323+K06856
Q6N091	K06856	IGH	immunoglobulin heavy chain	ko05330	Allograft rejection	http://www.kegg.jp/kegg-bin/show_pathway?ko05330+K06856
Q6N091	K06856	IGH	immunoglobulin heavy chain	ko05340	Primary immunodeficiency	http://www.kegg.jp/kegg-bin/show_pathway?ko05340+K06856
Q6N091	K06856	IGH	immunoglobulin heavy chain	ko05414	Dilated cardiomyopathy	http://www.kegg.jp/kegg-bin/show_pathway?ko05414+K06856
Q6N091	K06856	IGH	immunoglobulin heavy chain	ko05416	Viral myocarditis	http://www.kegg.jp/kegg-bin/show_pathway?ko05416+K06856
V9HWA9	K03990	C3	complement component 3	ko04145	Phagosome	http://www.kegg.jp/kegg-bin/show_pathway?ko04145+K03990
V9HWA9	K03990	C3	complement component 3	ko04610	Complement and coagulation cascades	http://www.kegg.jp/kegg-bin/show_pathway?ko04610+K03990
V9HWA9	K03990	C3	complement component 3	ko05133	Pertussis	http://www.kegg.jp/kegg-bin/show_pathway?ko05133+K03990
V9HWA9	K03990	C3	complement component 3	ko05134	Legionellosis	http://www.kegg.jp/kegg-bin/show_pathway?ko05134+K03990
V9HWA9	K03990	C3	complement component 3	ko05140	Leishmaniasis	http://www.kegg.jp/kegg-bin/show_pathway?ko05140+K03990
V9HWA9	K03990	C3	complement component 3	ko05142	Chagas disease (American trypanosomiasis)	http://www.kegg.jp/kegg-bin/show_pathway?ko05142+K03990
V9HWA9	K03990	C3	complement component 3	ko05150	Staphylococcus aureus infection	http://www.kegg.jp/kegg-bin/show_pathway?ko05150+K03990
V9HWA9	K03990	C3	complement component 3	ko05152	Tuberculosis	http://www.kegg.jp/kegg-bin/show_pathway?ko05152+K03990
V9HWA9	K03990	C3	complement component 3	ko05168	Herpes simplex infection	http://www.kegg.jp/kegg-bin/show_pathway?ko05168+K03990
V9HWA9	K03990	C3	complement component 3	ko05203	Viral carcinogenesis	http://www.kegg.jp/kegg-bin/show_pathway?ko05203+K03990
V9HWA9	K03990	C3	complement component 3	ko05322	Systemic lupus erythematosus	http://www.kegg.jp/kegg-bin/show_pathway?ko05322+K03990
Q8N355
Q65ZC8	K06856	IGH	immunoglobulin heavy chain	ko04020	Calcium signaling pathway	http://www.kegg.jp/kegg-bin/show_pathway?ko04020+K06856
Q65ZC8	K06856	IGH	immunoglobulin heavy chain	ko04064	NF-kappa B signaling pathway	http://www.kegg.jp/kegg-bin/show_pathway?ko04064+K06856
Q65ZC8	K06856	IGH	immunoglobulin heavy chain	ko04072	Phospholipase D signaling pathway	http://www.kegg.jp/kegg-bin/show_pathway?ko04072+K06856
Q65ZC8	K06856	IGH	immunoglobulin heavy chain	ko04145	Phagosome	http://www.kegg.jp/kegg-bin/show_pathway?ko04145+K06856
Q65ZC8	K06856	IGH	immunoglobulin heavy chain	ko04151	PI3K-Akt signaling pathway	http://www.kegg.jp/kegg-bin/show_pathway?ko04151+K06856
Q65ZC8	K06856	IGH	immunoglobulin heavy chain	ko04640	Hematopoietic cell lineage	http://www.kegg.jp/kegg-bin/show_pathway?ko04640+K06856
Q65ZC8	K06856	IGH	immunoglobulin heavy chain	ko04650	Natural killer cell mediated cytotoxicity	http://www.kegg.jp/kegg-bin/show_pathway?ko04650+K06856
Q65ZC8	K06856	IGH	immunoglobulin heavy chain	ko04662	B cell receptor signaling pathway	http://www.kegg.jp/kegg-bin/show_pathway?ko04662+K06856
Q65ZC8	K06856	IGH	immunoglobulin heavy chain	ko04664	Fc epsilon RI signaling pathway	http://www.kegg.jp/kegg-bin/show_pathway?ko04664+K06856
Q65ZC8	K06856	IGH	immunoglobulin heavy chain	ko04666	Fc gamma R-mediated phagocytosis	http://www.kegg.jp/kegg-bin/show_pathway?ko04666+K06856
Q65ZC8	K06856	IGH	immunoglobulin heavy chain	ko04672	Intestinal immune network for IgA production	http://www.kegg.jp/kegg-bin/show_pathway?ko04672+K06856
Q65ZC8	K06856	IGH	immunoglobulin heavy chain	ko05140	Leishmaniasis	http://www.kegg.jp/kegg-bin/show_pathway?ko05140+K06856
Q65ZC8	K06856	IGH	immunoglobulin heavy chain	ko05143	African trypanosomiasis	http://www.kegg.jp/kegg-bin/show_pathway?ko05143+K06856
Q65ZC8	K06856	IGH	immunoglobulin heavy chain	ko05146	Amoebiasis	http://www.kegg.jp/kegg-bin/show_pathway?ko05146+K06856
Q65ZC8	K06856	IGH	immunoglobulin heavy chain	ko05150	Staphylococcus aureus infection	http://www.kegg.jp/kegg-bin/show_pathway?ko05150+K06856
Q65ZC8	K06856	IGH	immunoglobulin heavy chain	ko05152	Tuberculosis	http://www.kegg.jp/kegg-bin/show_pathway?ko05152+K06856
Q65ZC8	K06856	IGH	immunoglobulin heavy chain	ko05162	Measles	http://www.kegg.jp/kegg-bin/show_pathway?ko05162+K06856
Q65ZC8	K06856	IGH	immunoglobulin heavy chain	ko05169	Epstein-Barr virus infection	http://www.kegg.jp/kegg-bin/show_pathway?ko05169+K06856
Q65ZC8	K06856	IGH	immunoglobulin heavy chain	ko05202	Transcriptional misregulation in cancer	http://www.kegg.jp/kegg-bin/show_pathway?ko05202+K06856
Q65ZC8	K06856	IGH	immunoglobulin heavy chain	ko05310	Asthma	http://www.kegg.jp/kegg-bin/show_pathway?ko05310+K06856
Q65ZC8	K06856	IGH	immunoglobulin heavy chain	ko05320	Autoimmune thyroid disease	http://www.kegg.jp/kegg-bin/show_pathway?ko05320+K06856
Q65ZC8	K06856	IGH	immunoglobulin heavy chain	ko05322	Systemic lupus erythematosus	http://www.kegg.jp/kegg-bin/show_pathway?ko05322+K06856
Q65ZC8	K06856	IGH	immunoglobulin heavy chain	ko05323	Rheumatoid arthritis	http://www.kegg.jp/kegg-bin/show_pathway?ko05323+K06856
Q65ZC8	K06856	IGH	immunoglobulin heavy chain	ko05330	Allograft rejection	http://www.kegg.jp/kegg-bin/show_pathway?ko05330+K06856
Q65ZC8	K06856	IGH	immunoglobulin heavy chain	ko05340	Primary immunodeficiency	http://www.kegg.jp/kegg-bin/show_pathway?ko05340+K06856
Q65ZC8	K06856	IGH	immunoglobulin heavy chain	ko05414	Dilated cardiomyopathy	http://www.kegg.jp/kegg-bin/show_pathway?ko05414+K06856
Q65ZC8	K06856	IGH	immunoglobulin heavy chain	ko05416	Viral myocarditis	http://www.kegg.jp/kegg-bin/show_pathway?ko05416+K06856
Q9UL82
A0A0X9V9C4	K06856	IGH	immunoglobulin heavy chain	ko04020	Calcium signaling pathway	http://www.kegg.jp/kegg-bin/show_pathway?ko04020+K06856
A0A0X9V9C4	K06856	IGH	immunoglobulin heavy chain	ko04064	NF-kappa B signaling pathway	http://www.kegg.jp/kegg-bin/show_pathway?ko04064+K06856
A0A0X9V9C4	K06856	IGH	immunoglobulin heavy chain	ko04072	Phospholipase D signaling pathway	http://www.kegg.jp/kegg-bin/show_pathway?ko04072+K06856
A0A0X9V9C4	K06856	IGH	immunoglobulin heavy chain	ko04145	Phagosome	http://www.kegg.jp/kegg-bin/show_pathway?ko04145+K06856
A0A0X9V9C4	K06856	IGH	immunoglobulin heavy chain	ko04151	PI3K-Akt signaling pathway	http://www.kegg.jp/kegg-bin/show_pathway?ko04151+K06856
A0A0X9V9C4	K06856	IGH	immunoglobulin heavy chain	ko04640	Hematopoietic cell lineage	http://www.kegg.jp/kegg-bin/show_pathway?ko04640+K06856
A0A0X9V9C4	K06856	IGH	immunoglobulin heavy chain	ko04650	Natural killer cell mediated cytotoxicity	http://www.kegg.jp/kegg-bin/show_pathway?ko04650+K06856
A0A0X9V9C4	K06856	IGH	immunoglobulin heavy chain	ko04662	B cell receptor signaling pathway	http://www.kegg.jp/kegg-bin/show_pathway?ko04662+K06856
A0A0X9V9C4	K06856	IGH	immunoglobulin heavy chain	ko04664	Fc epsilon RI signaling pathway	http://www.kegg.jp/kegg-bin/show_pathway?ko04664+K06856
A0A0X9V9C4	K06856	IGH	immunoglobulin heavy chain	ko04666	Fc gamma R-mediated phagocytosis	http://www.kegg.jp/kegg-bin/show_pathway?ko04666+K06856
A0A0X9V9C4	K06856	IGH	immunoglobulin heavy chain	ko04672	Intestinal immune network for IgA production	http://www.kegg.jp/kegg-bin/show_pathway?ko04672+K06856
A0A0X9V9C4	K06856	IGH	immunoglobulin heavy chain	ko05140	Leishmaniasis	http://www.kegg.jp/kegg-bin/show_pathway?ko05140+K06856
A0A0X9V9C4	K06856	IGH	immunoglobulin heavy chain	ko05143	African trypanosomiasis	http://www.kegg.jp/kegg-bin/show_pathway?ko05143+K06856
A0A0X9V9C4	K06856	IGH	immunoglobulin heavy chain	ko05146	Amoebiasis	http://www.kegg.jp/kegg-bin/show_pathway?ko05146+K06856
A0A0X9V9C4	K06856	IGH	immunoglobulin heavy chain	ko05150	Staphylococcus aureus infection	http://www.kegg.jp/kegg-bin/show_pathway?ko05150+K06856
A0A0X9V9C4	K06856	IGH	immunoglobulin heavy chain	ko05152	Tuberculosis	http://www.kegg.jp/kegg-bin/show_pathway?ko05152+K06856
A0A0X9V9C4	K06856	IGH	immunoglobulin heavy chain	ko05162	Measles	http://www.kegg.jp/kegg-bin/show_pathway?ko05162+K06856
A0A0X9V9C4	K06856	IGH	immunoglobulin heavy chain	ko05169	Epstein-Barr virus infection	http://www.kegg.jp/kegg-bin/show_pathway?ko05169+K06856
A0A0X9V9C4	K06856	IGH	immunoglobulin heavy chain	ko05202	Transcriptional misregulation in cancer	http://www.kegg.jp/kegg-bin/show_pathway?ko05202+K06856
A0A0X9V9C4	K06856	IGH	immunoglobulin heavy chain	ko05310	Asthma	http://www.kegg.jp/kegg-bin/show_pathway?ko05310+K06856
A0A0X9V9C4	K06856	IGH	immunoglobulin heavy chain	ko05320	Autoimmune thyroid disease	http://www.kegg.jp/kegg-bin/show_pathway?ko05320+K06856
A0A0X9V9C4	K06856	IGH	immunoglobulin heavy chain	ko05322	Systemic lupus erythematosus	http://www.kegg.jp/kegg-bin/show_pathway?ko05322+K06856
A0A0X9V9C4	K06856	IGH	immunoglobulin heavy chain	ko05323	Rheumatoid arthritis	http://www.kegg.jp/kegg-bin/show_pathway?ko05323+K06856
A0A0X9V9C4	K06856	IGH	immunoglobulin heavy chain	ko05330	Allograft rejection	http://www.kegg.jp/kegg-bin/show_pathway?ko05330+K06856
A0A0X9V9C4	K06856	IGH	immunoglobulin heavy chain	ko05340	Primary immunodeficiency	http://www.kegg.jp/kegg-bin/show_pathway?ko05340+K06856
A0A0X9V9C4	K06856	IGH	immunoglobulin heavy chain	ko05414	Dilated cardiomyopathy	http://www.kegg.jp/kegg-bin/show_pathway?ko05414+K06856
A0A0X9V9C4	K06856	IGH	immunoglobulin heavy chain	ko05416	Viral myocarditis	http://www.kegg.jp/kegg-bin/show_pathway?ko05416+K06856
P02768	K16141	ALB	serum albumin	ko04918	Thyroid hormone synthesis	http://www.kegg.jp/kegg-bin/show_pathway?ko04918+K16141
Q6N030	K06856	IGH	immunoglobulin heavy chain	ko04020	Calcium signaling pathway	http://www.kegg.jp/kegg-bin/show_pathway?ko04020+K06856
Q6N030	K06856	IGH	immunoglobulin heavy chain	ko04064	NF-kappa B signaling pathway	http://www.kegg.jp/kegg-bin/show_pathway?ko04064+K06856
Q6N030	K06856	IGH	immunoglobulin heavy chain	ko04072	Phospholipase D signaling pathway	http://www.kegg.jp/kegg-bin/show_pathway?ko04072+K06856
Q6N030	K06856	IGH	immunoglobulin heavy chain	ko04145	Phagosome	http://www.kegg.jp/kegg-bin/show_pathway?ko04145+K06856
Q6N030	K06856	IGH	immunoglobulin heavy chain	ko04151	PI3K-Akt signaling pathway	http://www.kegg.jp/kegg-bin/show_pathway?ko04151+K06856
Q6N030	K06856	IGH	immunoglobulin heavy chain	ko04640	Hematopoietic cell lineage	http://www.kegg.jp/kegg-bin/show_pathway?ko04640+K06856
Q6N030	K06856	IGH	immunoglobulin heavy chain	ko04650	Natural killer cell mediated cytotoxicity	http://www.kegg.jp/kegg-bin/show_pathway?ko04650+K06856
Q6N030	K06856	IGH	immunoglobulin heavy chain	ko04662	B cell receptor signaling pathway	http://www.kegg.jp/kegg-bin/show_pathway?ko04662+K06856
Q6N030	K06856	IGH	immunoglobulin heavy chain	ko04664	Fc epsilon RI signaling pathway	http://www.kegg.jp/kegg-bin/show_pathway?ko04664+K06856
Q6N030	K06856	IGH	immunoglobulin heavy chain	ko04666	Fc gamma R-mediated phagocytosis	http://www.kegg.jp/kegg-bin/show_pathway?ko04666+K06856
Q6N030	K06856	IGH	immunoglobulin heavy chain	ko04672	Intestinal immune network for IgA production	http://www.kegg.jp/kegg-bin/show_pathway?ko04672+K06856
Q6N030	K06856	IGH	immunoglobulin heavy chain	ko05140	Leishmaniasis	http://www.kegg.jp/kegg-bin/show_pathway?ko05140+K06856
Q6N030	K06856	IGH	immunoglobulin heavy chain	ko05143	African trypanosomiasis	http://www.kegg.jp/kegg-bin/show_pathway?ko05143+K06856
Q6N030	K06856	IGH	immunoglobulin heavy chain	ko05146	Amoebiasis	http://www.kegg.jp/kegg-bin/show_pathway?ko05146+K06856
Q6N030	K06856	IGH	immunoglobulin heavy chain	ko05150	Staphylococcus aureus infection	http://www.kegg.jp/kegg-bin/show_pathway?ko05150+K06856
Q6N030	K06856	IGH	immunoglobulin heavy chain	ko05152	Tuberculosis	http://www.kegg.jp/kegg-bin/show_pathway?ko05152+K06856
Q6N030	K06856	IGH	immunoglobulin heavy chain	ko05162	Measles	http://www.kegg.jp/kegg-bin/show_pathway?ko05162+K06856
Q6N030	K06856	IGH	immunoglobulin heavy chain	ko05169	Epstein-Barr virus infection	http://www.kegg.jp/kegg-bin/show_pathway?ko05169+K06856
Q6N030	K06856	IGH	immunoglobulin heavy chain	ko05202	Transcriptional misregulation in cancer	http://www.kegg.jp/kegg-bin/show_pathway?ko05202+K06856
Q6N030	K06856	IGH	immunoglobulin heavy chain	ko05310	Asthma	http://www.kegg.jp/kegg-bin/show_pathway?ko05310+K06856
Q6N030	K06856	IGH	immunoglobulin heavy chain	ko05320	Autoimmune thyroid disease	http://www.kegg.jp/kegg-bin/show_pathway?ko05320+K06856
Q6N030	K06856	IGH	immunoglobulin heavy chain	ko05322	Systemic lupus erythematosus	http://www.kegg.jp/kegg-bin/show_pathway?ko05322+K06856
Q6N030	K06856	IGH	immunoglobulin heavy chain	ko05323	Rheumatoid arthritis	http://www.kegg.jp/kegg-bin/show_pathway?ko05323+K06856
Q6N030	K06856	IGH	immunoglobulin heavy chain	ko05330	Allograft rejection	http://www.kegg.jp/kegg-bin/show_pathway?ko05330+K06856
Q6N030	K06856	IGH	immunoglobulin heavy chain	ko05340	Primary immunodeficiency	http://www.kegg.jp/kegg-bin/show_pathway?ko05340+K06856
Q6N030	K06856	IGH	immunoglobulin heavy chain	ko05414	Dilated cardiomyopathy	http://www.kegg.jp/kegg-bin/show_pathway?ko05414+K06856
Q6N030	K06856	IGH	immunoglobulin heavy chain	ko05416	Viral myocarditis	http://www.kegg.jp/kegg-bin/show_pathway?ko05416+K06856
H0YB09
